# Supplementary material for: The ACA’s Dependent Coverage Expansion and Out-of-Pocket Spending by Young Adults With Behavioral Health Conditions
Source: Atypon-hosted journal article supplement (doi:10.1176/appi.ps.201500346), 2016-05-16
Supplement: appi.ps.201500346.ds001.pdf [file appi.ps.201500346.ds001.pdf]

## **Appendix**

Behavioral health disorders were coded using the Clinical Classification Software codes (651-670)

Anxiety disorder

Attention-deficit

Cognitive disorders Development disorders

Disorders usually diagnosed in infancy, childhood, or adolescences Impulse control

Mood disorders

Personality disorder

Schizophrenia and other psychotic disorders

Alcohol related disorders

Substance related disorder

Suicide and intentional self-inflicted injury

Screening and history of mental health and substance abuse codes

Miscellaneous disorders

Note: Clinical Classification Software, using the ICD-9 codes, was developed by the Agency for Healthcare Research and Quality.
