# Supplementary material for: The ACA’s Dependent Coverage Expansion and Out-of-Pocket Spending by Young Adults With Behavioral Health Conditions
Source: Atypon-hosted journal article supplement (doi:10.1176/appi.ps.201500346), 2016-05-16
Supplement: appi.ps.201500346.ds001.pdf [file appi.ps.201500346.ds001.pdf]

 


Psychiatry Online
